# Supplementary material for: Characterizing Timing Noise in Normal Pulsars with the Nanshan Radio Telescope
Source: MDPI journal article supplement (doi:10.3390/universe10030105), 2024-02-26

## Supplementary online figure

The observed power spectra of the timing noise in 85 pulsars. The fitted noise models are shown as dashed lines with the spectral exponents presented in the up-right corner.

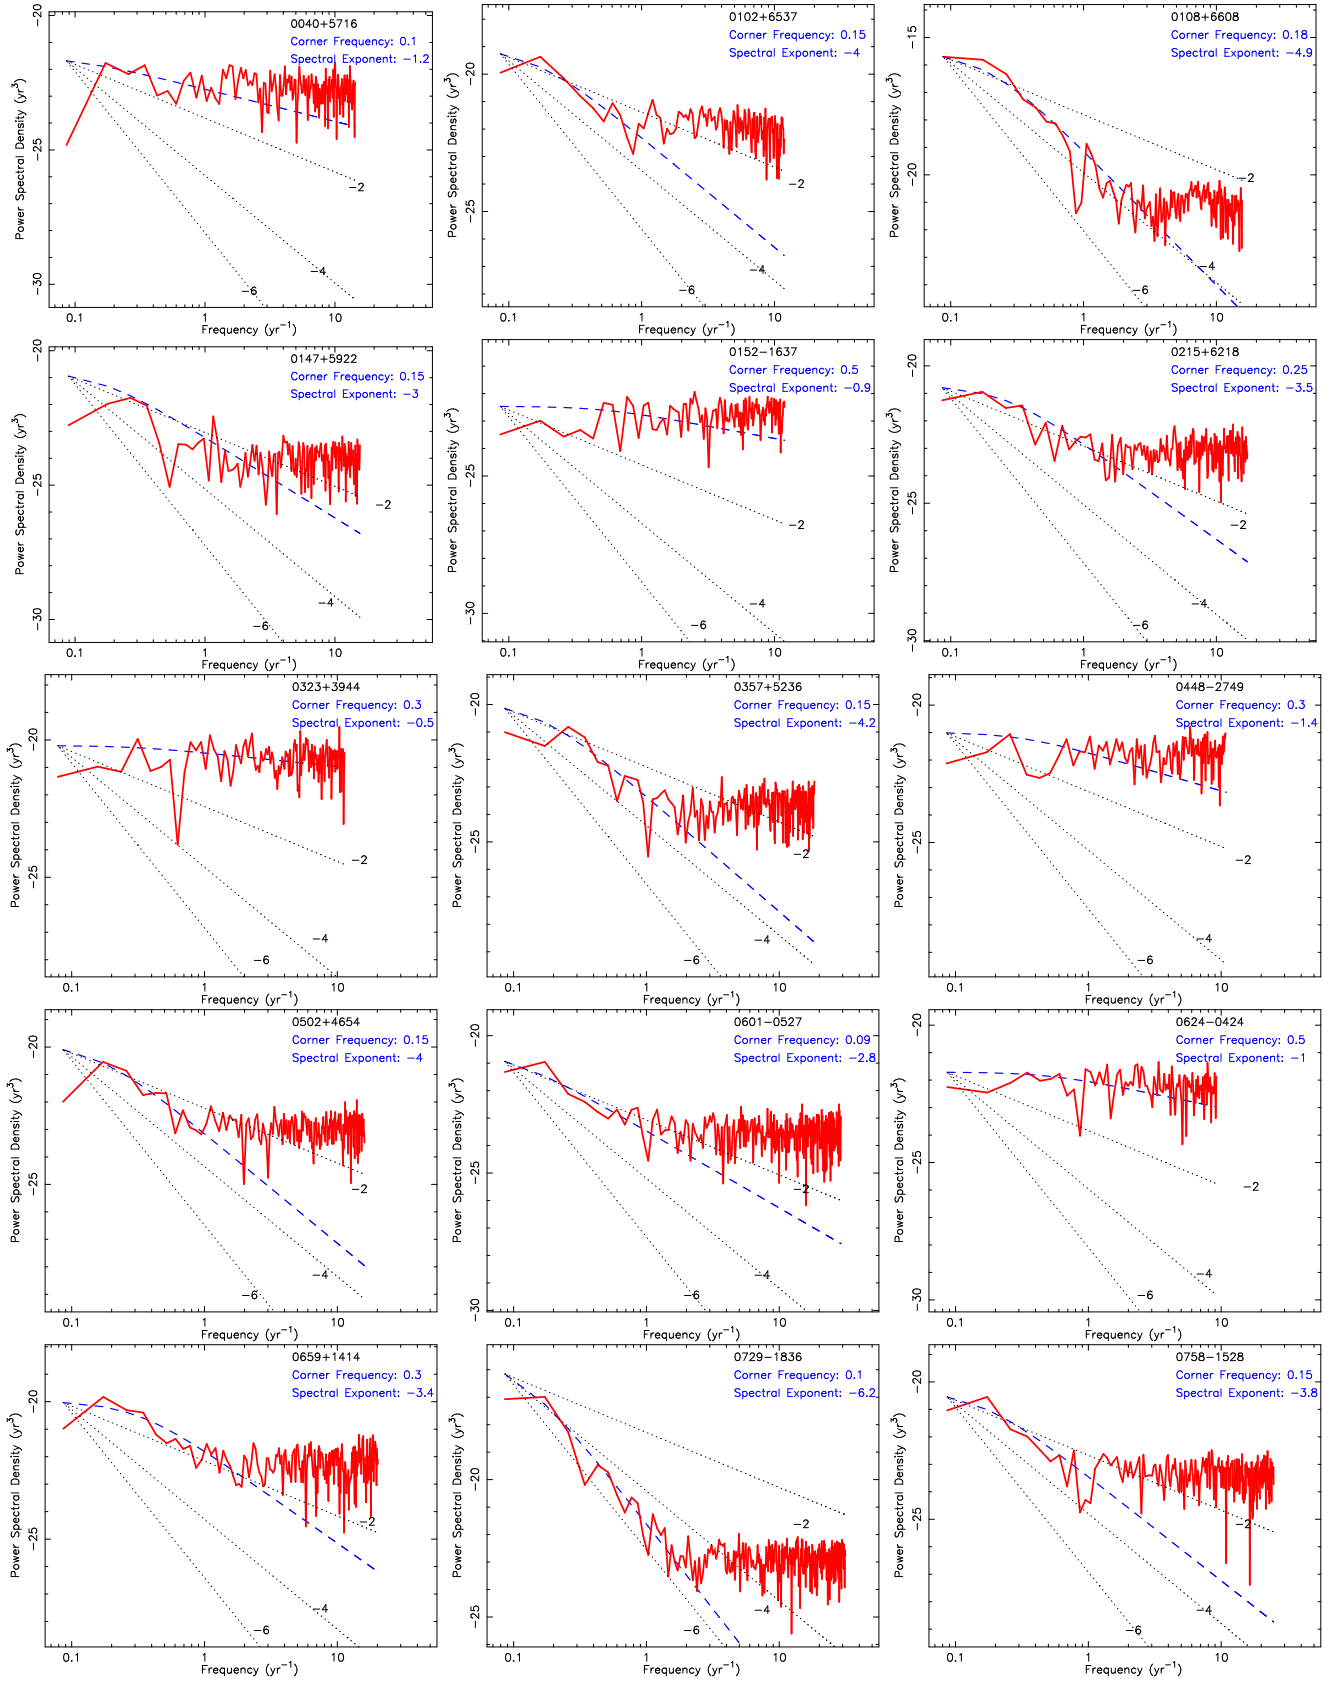

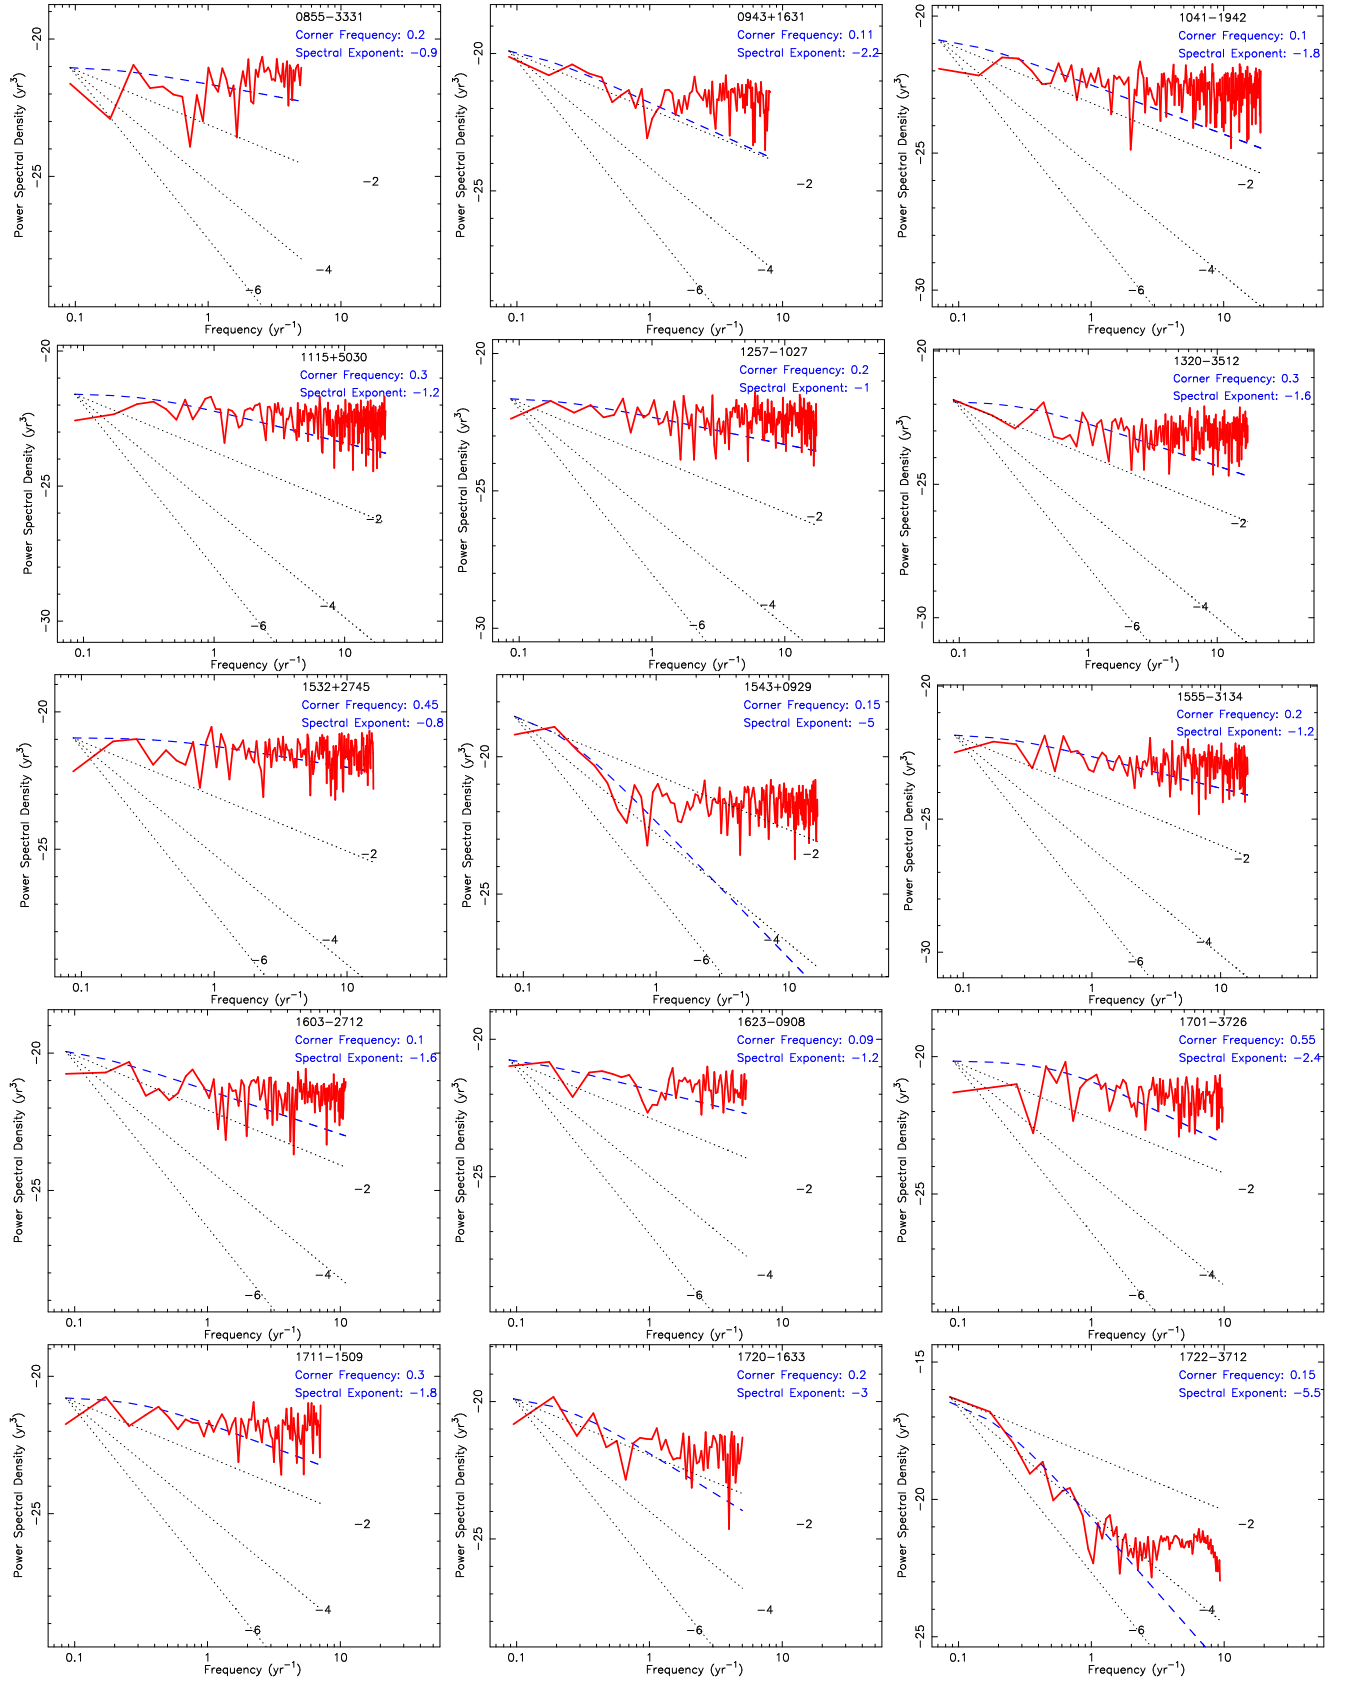

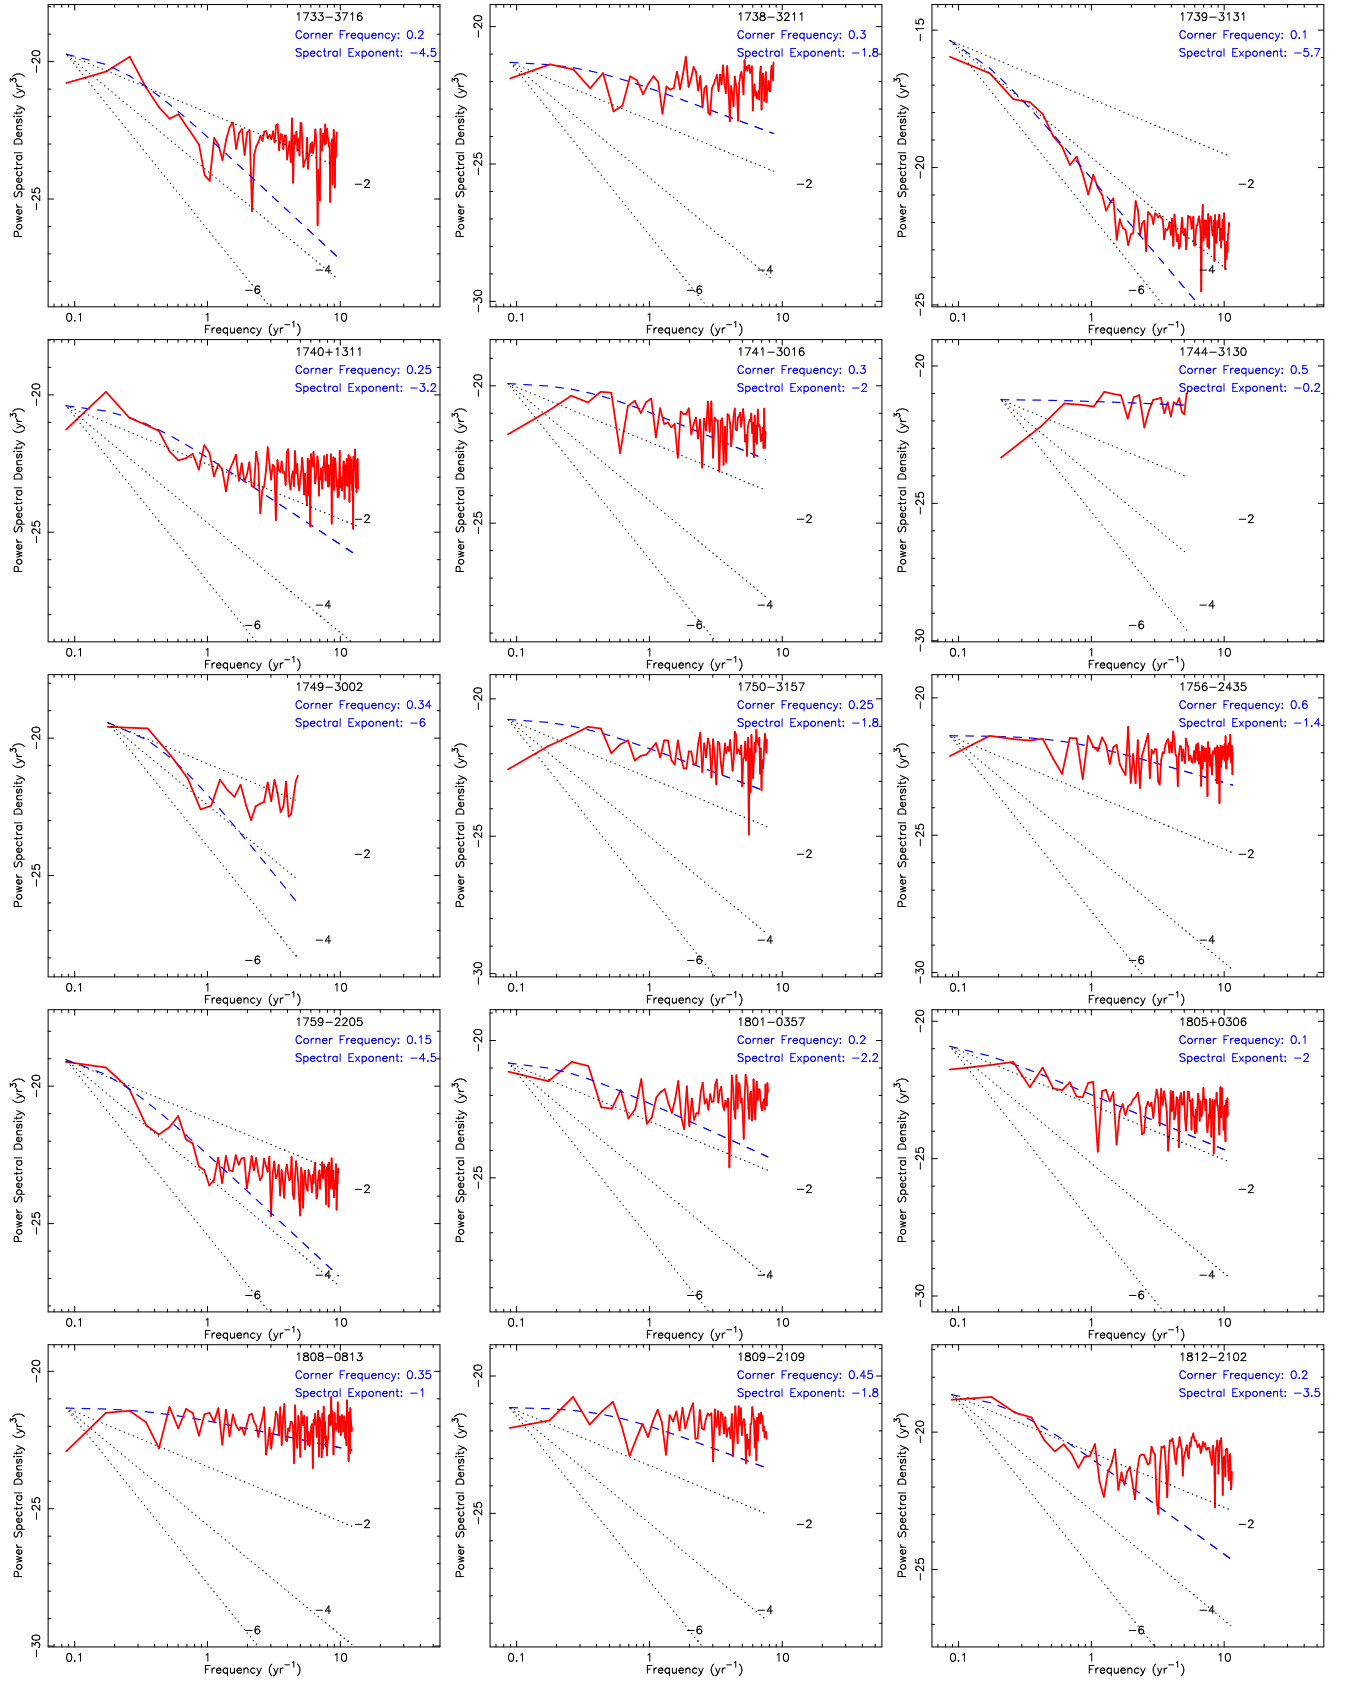

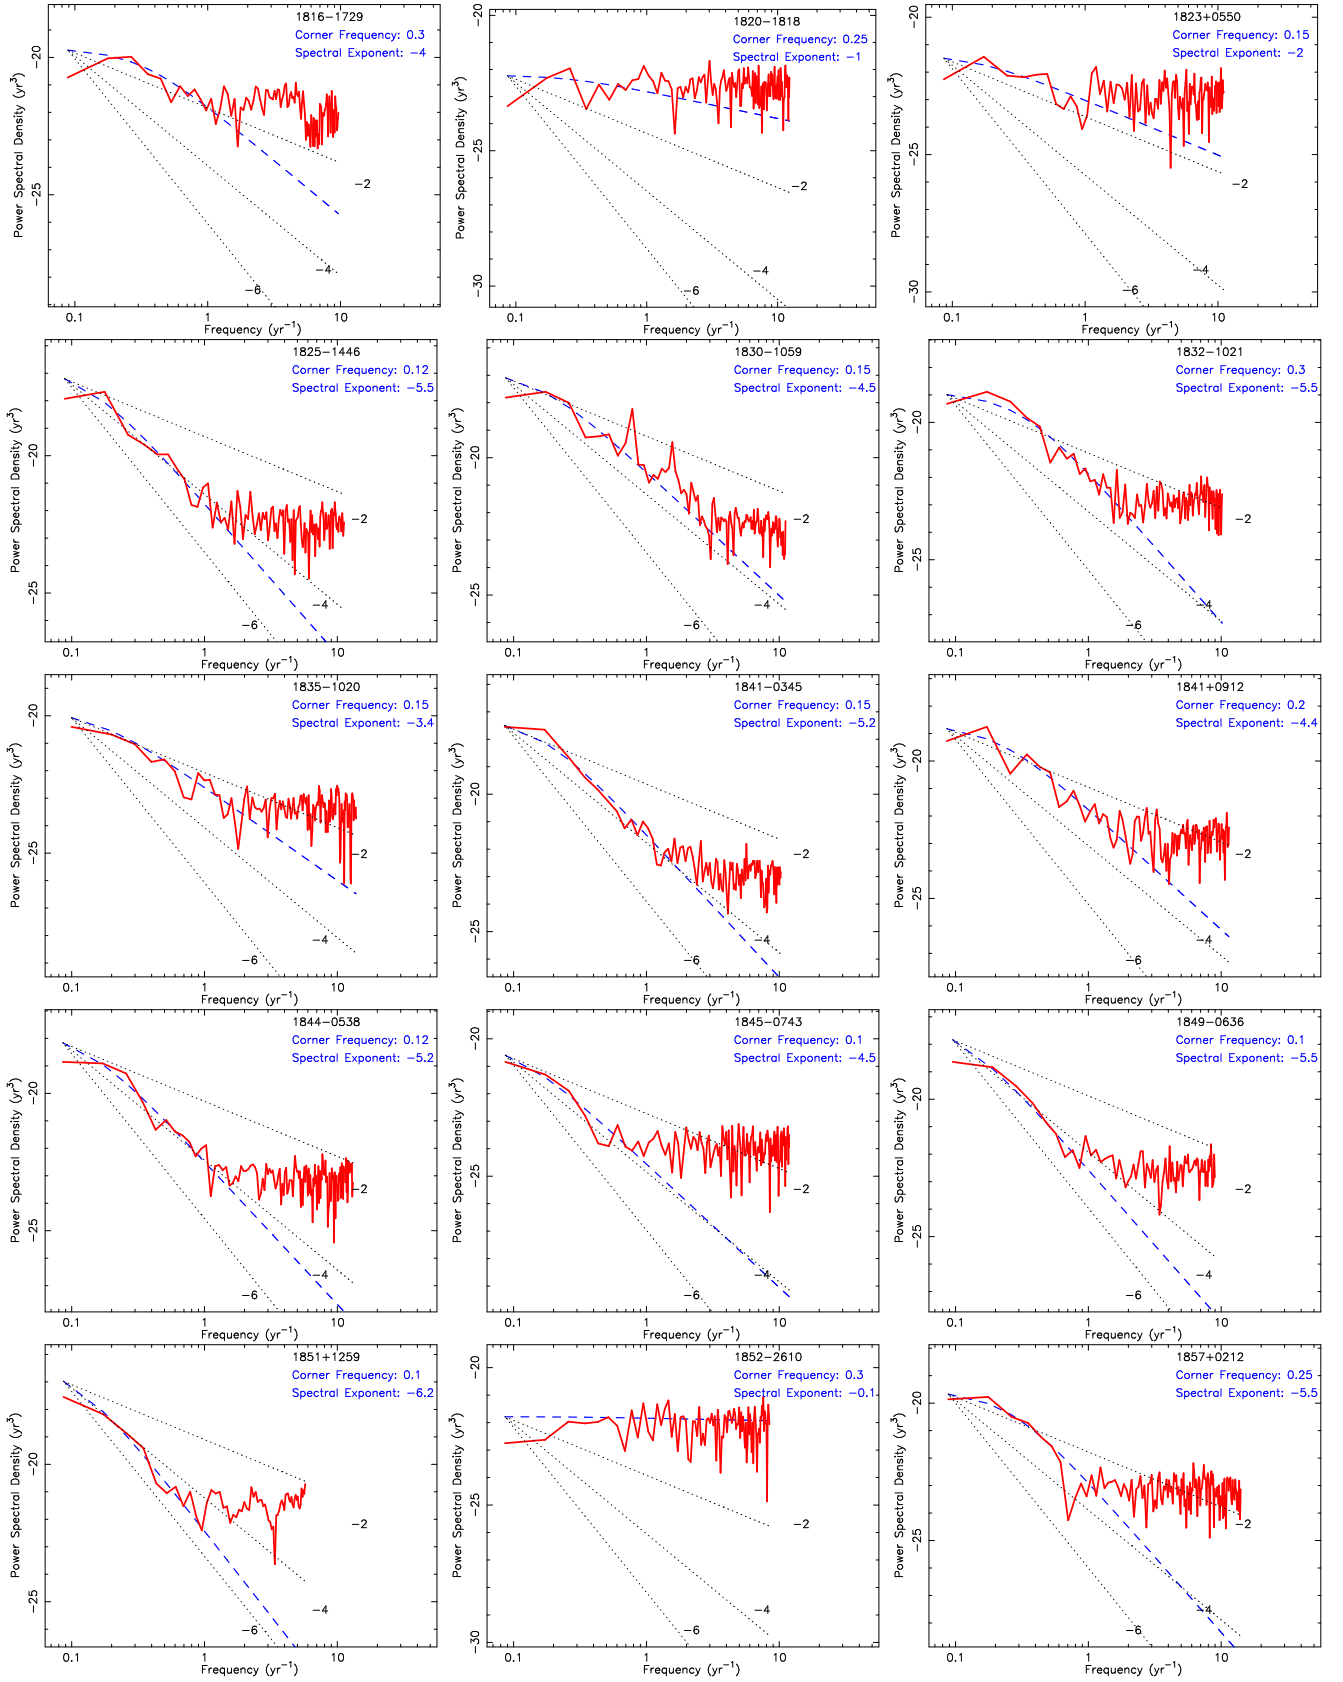

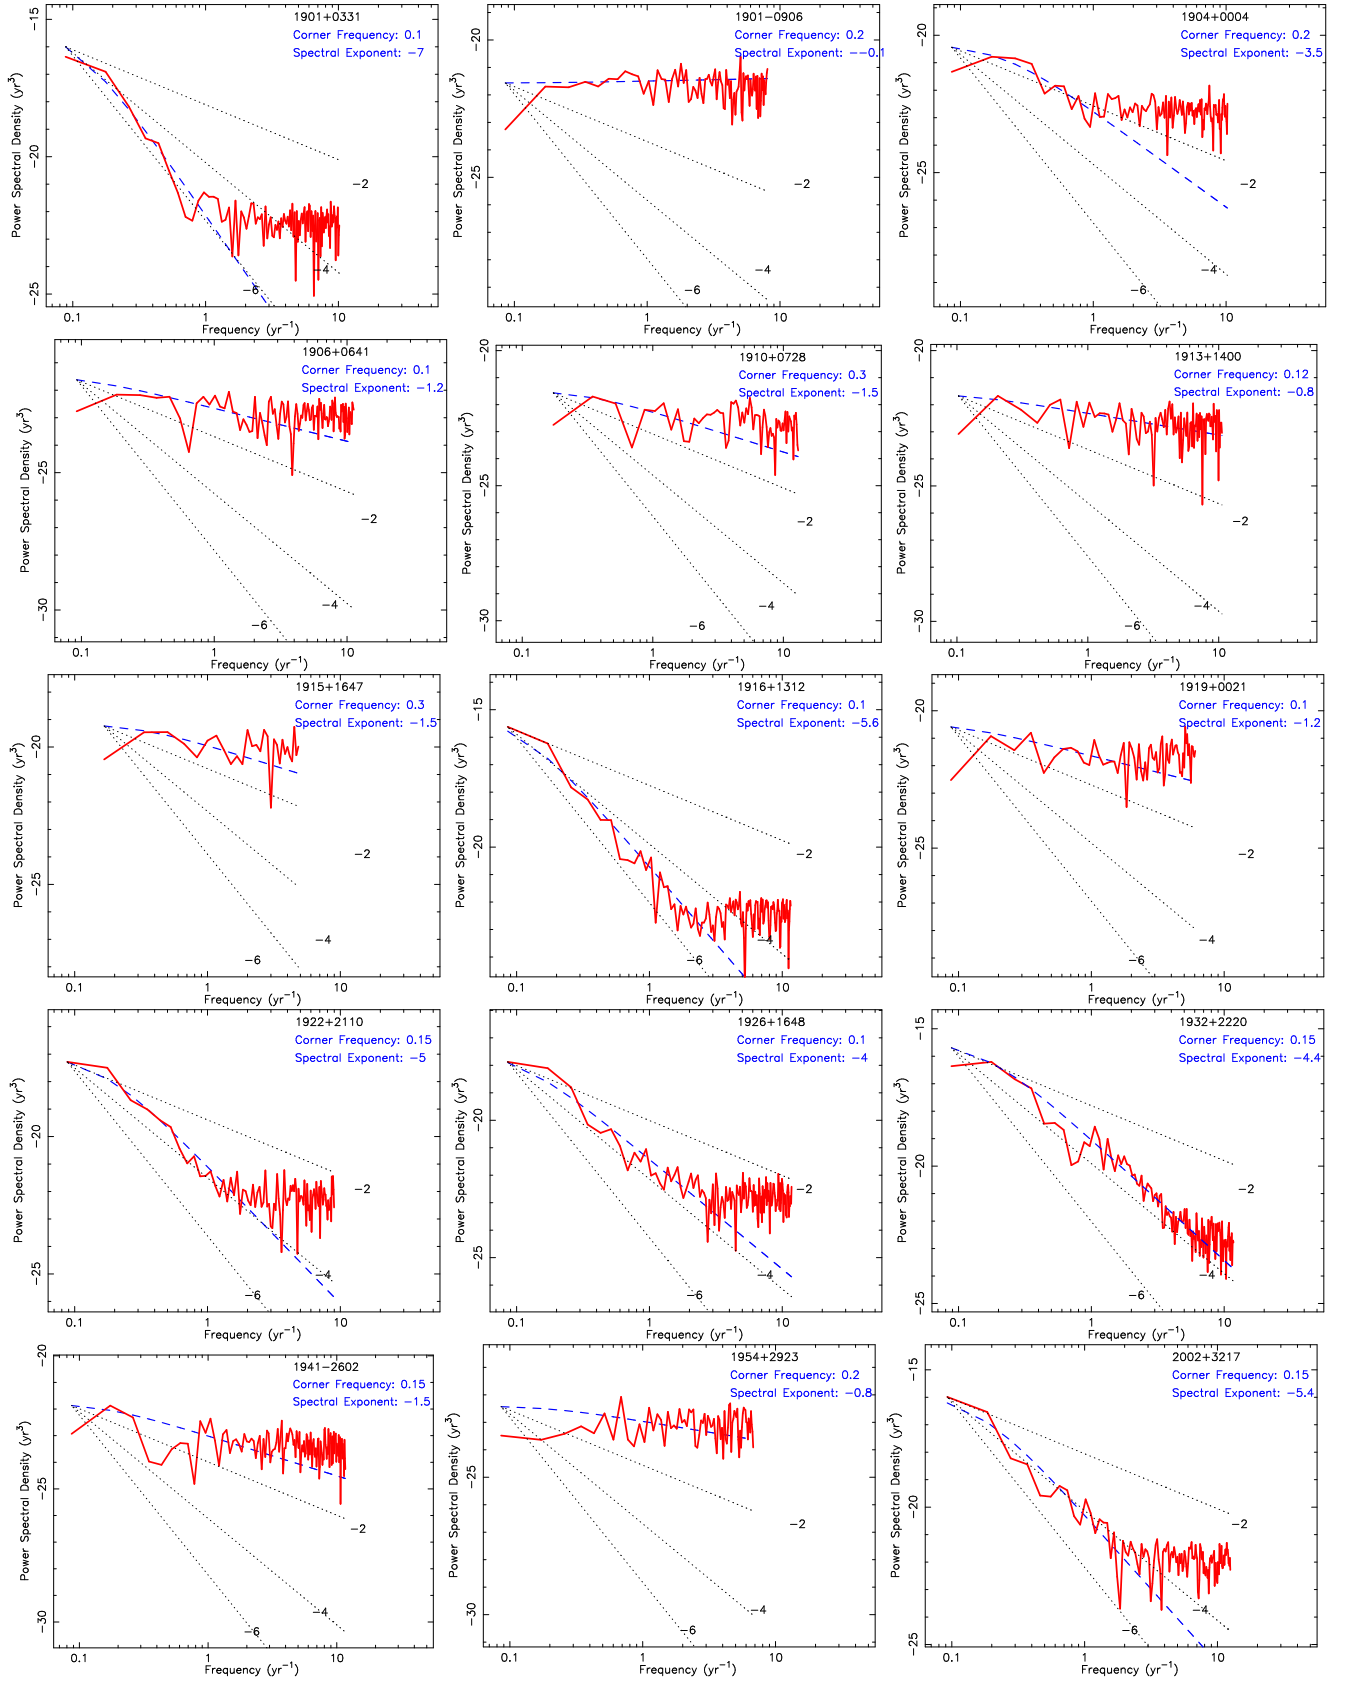

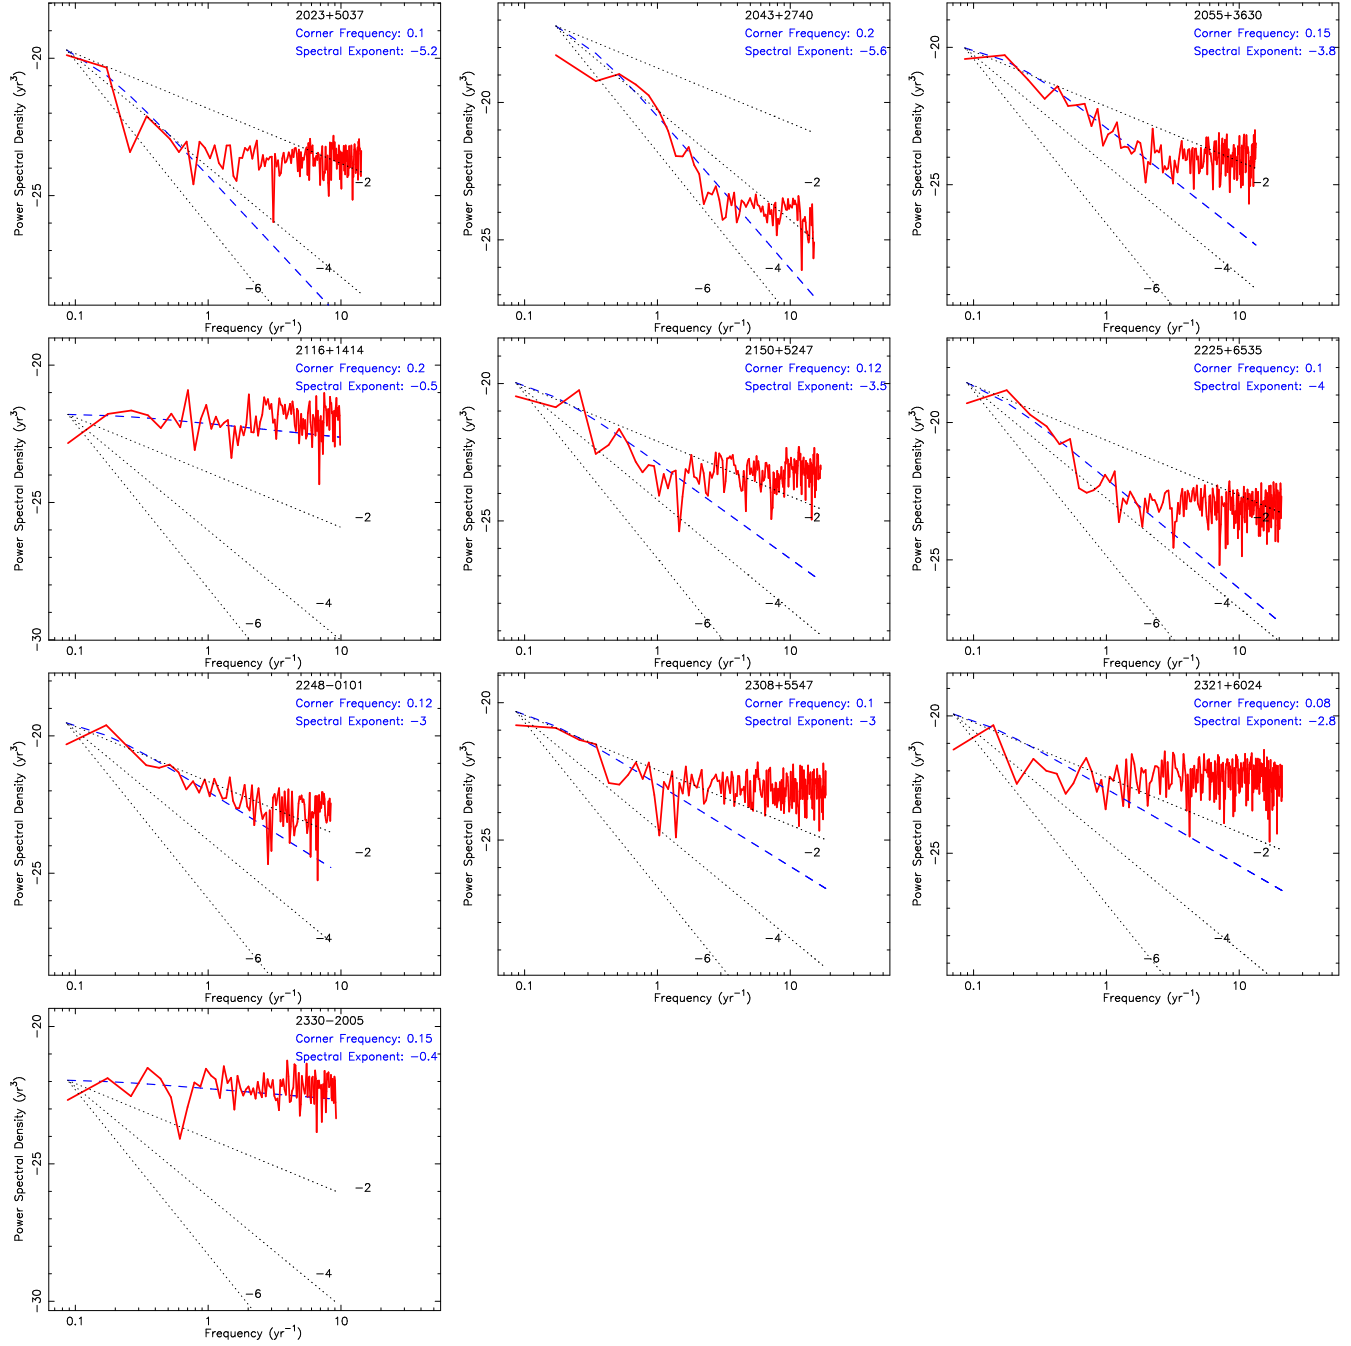

Supplement: s1 [file s1]
